# Supplementary material for: Application of Decoupling Approach to Evaluate Electricity Consumption, Agriculture, GDP, Crude Oil Production, and CO2 Emission Nexus in Support of Economic Instrument in Nigeria
Source: MDPI journal article supplement (doi:10.3390/su14063226), 2022-03-09
Supplement: s1 [file s1]

**Table S1.** Autoregressive distributed lag (ARDL) Result.

| Variable  | Coefficient | P-value |
|-----------|-------------|---------|
| C02(-1)   | 0.412823    | 0.0464  |
| COP       | 1.20002     | 0.0936  |
| AGRIC     | -1.069375   | 0.1938  |
| AGRIC(-1) | 1.173194    | 0.1108  |
| ELEC      | 0.191872    | 0.6375  |
| ELEC(-1)  | -0.404211   | 0.3832  |
| ELEC(-2)  | -1.271831   | 0.0112  |
| RGDP      | 5.107419    | 0.0755  |
| RGDP(-1)  | -6.079526   | 0.0461  |
| RGDP(-2)  | 2.800421    | 0.1083  |
| C         | -18.46477   | 0.0988  |

Source: Authors' computation
